# Supplementary material for: Novel design, facile synthesis and low infrared emissivity properties of single-handed helical polysilanes
Source: Royal Society of Chemistry journal article supplement (doi:10.1039/c5ra17239j), 2015-01-01
Supplement: c5ra17239j1.pdf [file c5ra17239j1.pdf]

## Electronic Supplementary Information

### **Novel design, facile synthesis and low infrared emissivity properties of single-handed helical polysilanes**

Muyang Zhang, Yuming Zhou\*, Man He, Tao zhang, Xiaohai Bu

School of Chemistry and Chemical Engineering, Southeast University, Jiangsu  
Optoelectronic Functional Materials and Engineering Laboratory, Nanjing 211189,  
People's Republic of China Correspondence to: Y. Zhou (E-mail:  
ymzhou@seu.edu.cn)

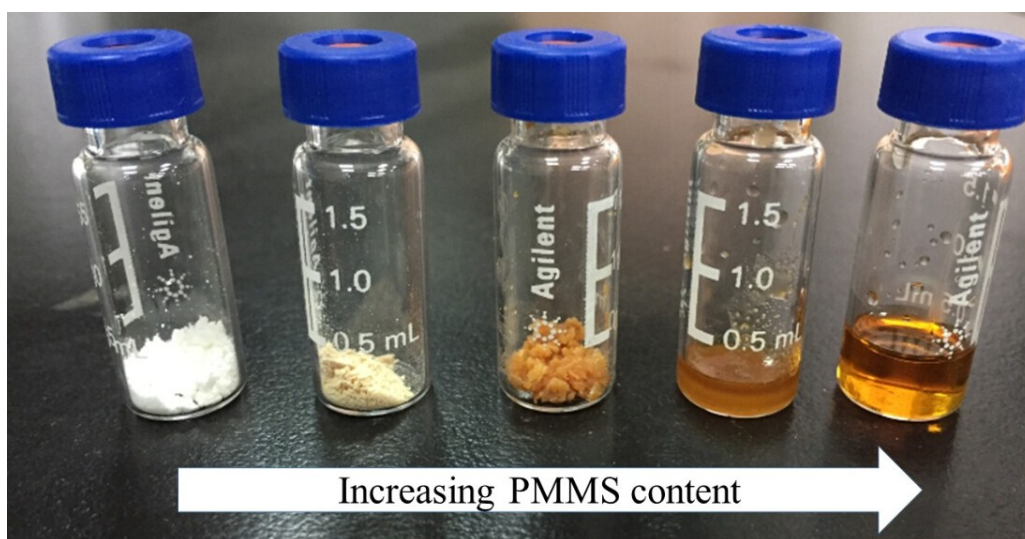

**Fig. S1.** Random poly[di-*n*-hexylsilane-co-(methoxycarbonyl ethyl propyl ether)methylsilane HPS copolymers from left to right with MMS contents of 0%,10%, 30%, 50%, and 100%, respectively, as determined by the copolymerization ratio.

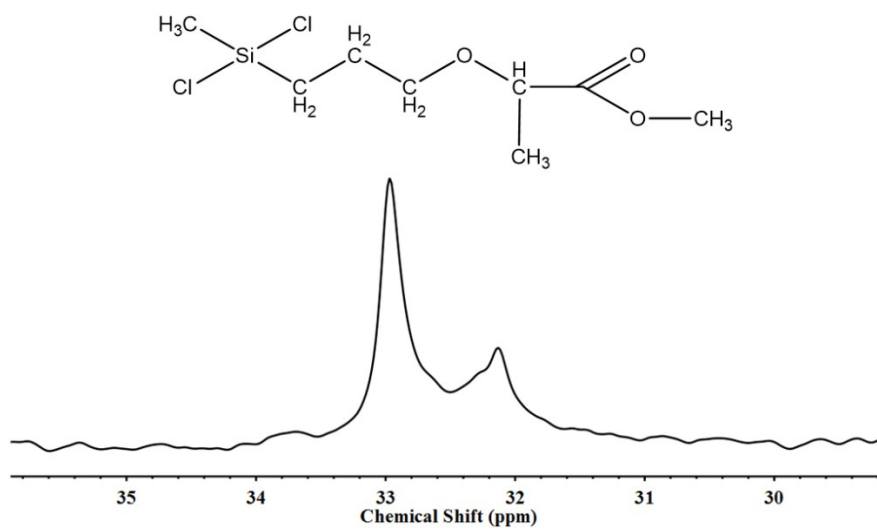

**Fig. S2.** Inverse gated  $^{29}\text{Si}$  NMR spectrum ( $\text{CDCl}_3$ , 99.35 MHz) of DCMMS and peak assignment.

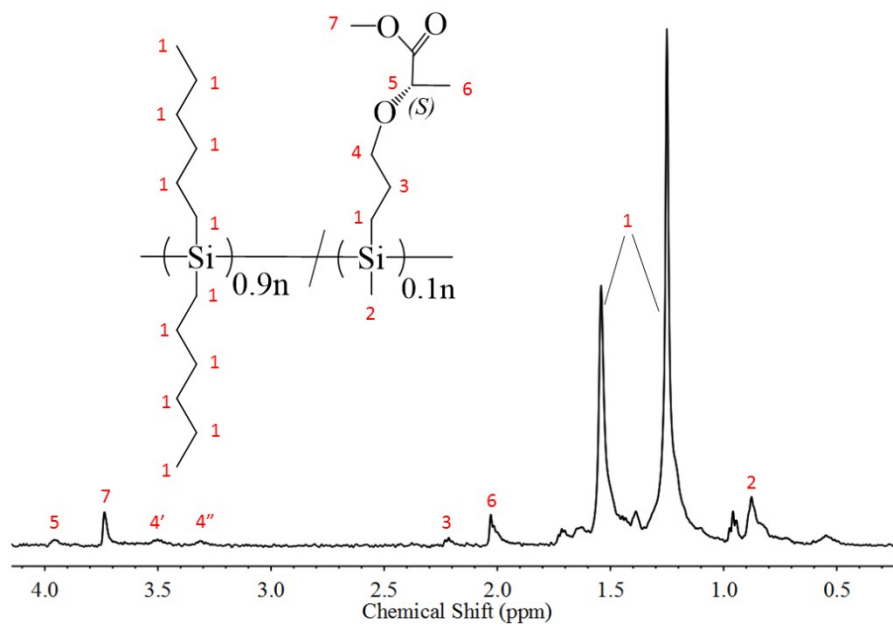

**Fig. S3.**  $^1\text{H}$  NMR spectrum ( $\text{CDCl}_3$ , 300 MHz) of HPS-1 and peak assignment.

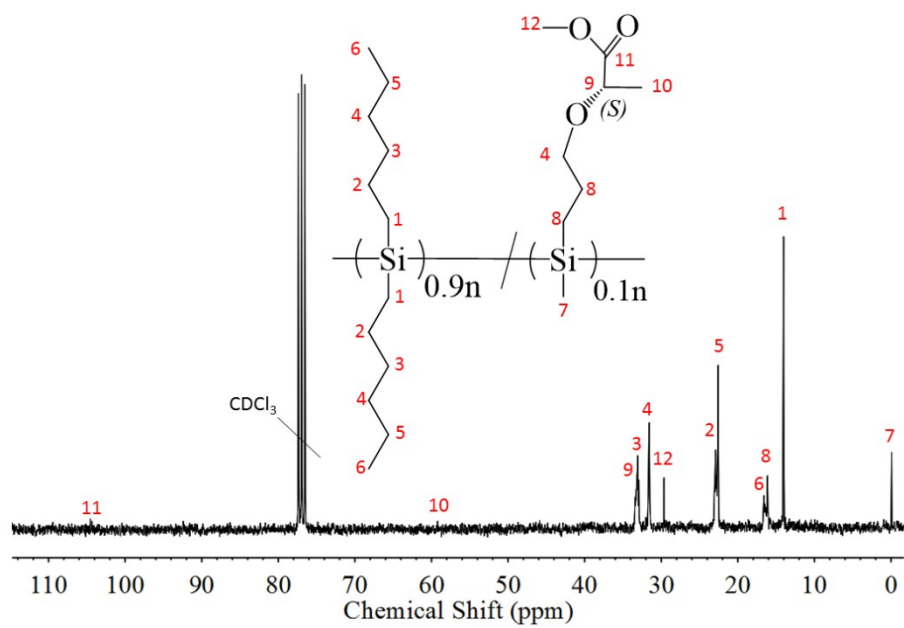

**Fig. S4.**  $^{13}\text{C}$  NMR spectrum ( $\text{CDCl}_3$ , 75 MHz) of HPS-1 and peak assignment.

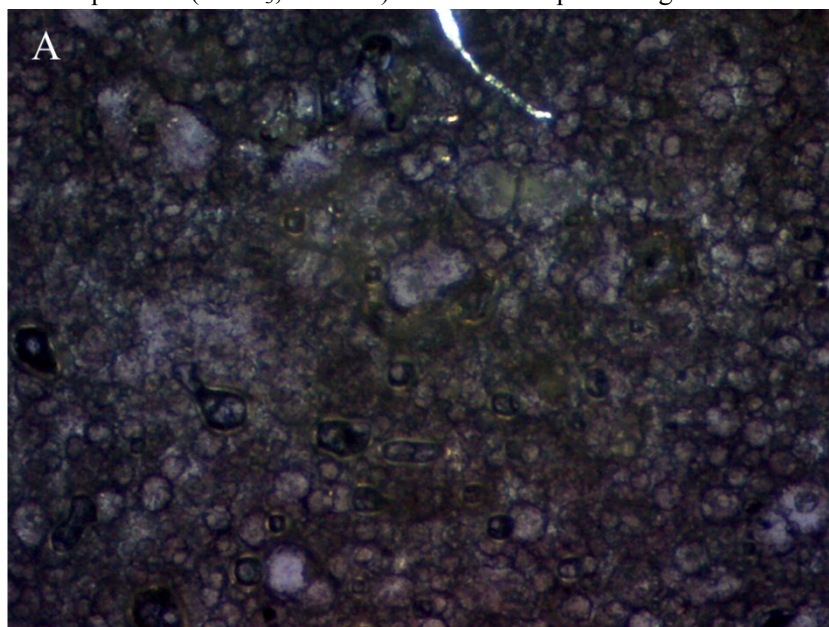

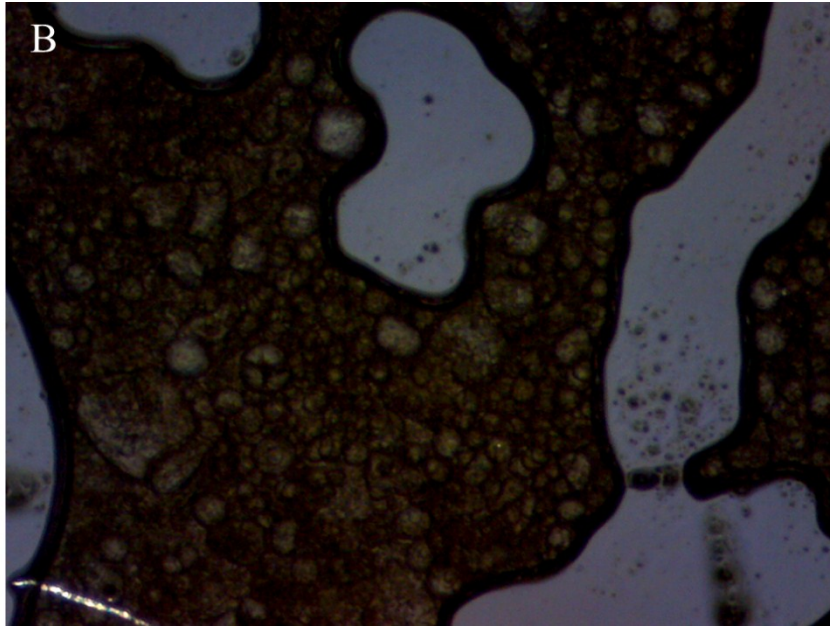

**Fig. S5.** Microscopy images of HPS-3: (A) at room temperature; (B) after melting.
